# Supplementary material
Source: PubMed Central journal article supplement (PMC7288371)
Supplement: ao9b04205_si_001.pdf [file ao9b04205_si_001.pdf]

## Supporting information

### Waterproof Flexible Polymer Functionalized Graphene Based Piezoresistive Strain Sensor for Structural Health Monitoring and Wearable Devices

Vetrivel Sankar<sup>1,2</sup>, Ashwin Nambi<sup>1</sup>, Vivek Nagendra Bhat<sup>1</sup>, Debadatta Sethy<sup>2</sup>, Krishnan Balasubramaniam<sup>2</sup>, Sumitesh Das<sup>3</sup>, Mriganshu Guha<sup>4</sup>, Ramaprabhu Sundara<sup>1\*</sup>

<sup>1</sup>Alternative Energy and Nanotechnology Laboratory (AENL), Nano Functional Materials Technology Centre (NFMTC), Department of Physics, Indian Institute of Technology Madras, Chennai, India. <sup>2</sup>Centre for Non-Destructive Evaluation (CNDE), Department of Mechanical Engineering, Indian Institute of Technology Madras, Chennai, India. <sup>3</sup>Graphene Business, Tata Steel Ltd., Jamshedpur, India. <sup>4</sup>Tata Steel Advanced Material Research Centre, Chennai, India.

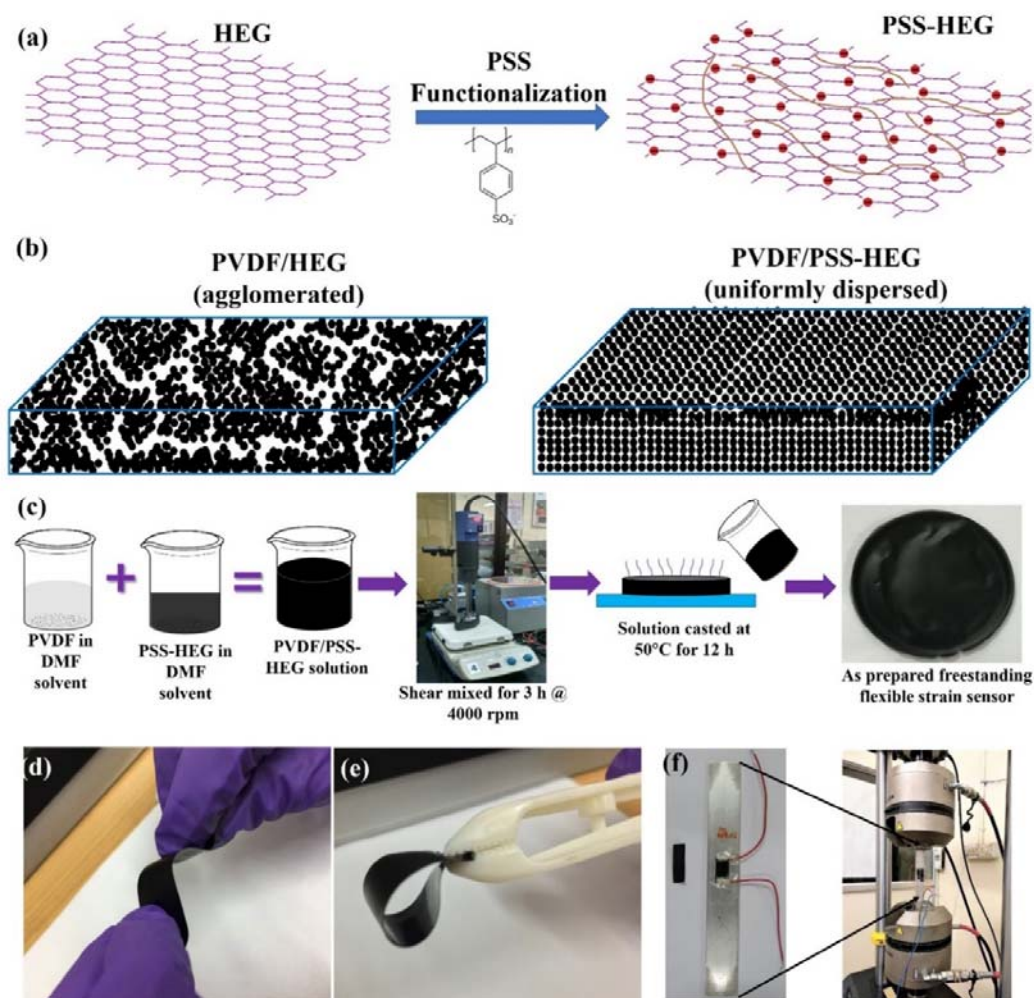

Figure S1 (a). Schematic of PSS polymer functionalization of the HEG, (b) schematic of dispersion of pristine HEG and PSS-HEG in PVDF matrix, (c) synthesis procedure of PVDF/HEG polymer nanocomposite based freestanding flexible strain sensor, (d, e) digital image to show the flexibility and robustness of the developed strain sensor and (f) fabricated strain sensor on the aluminium specimen which is under uniaxial tensile loading.

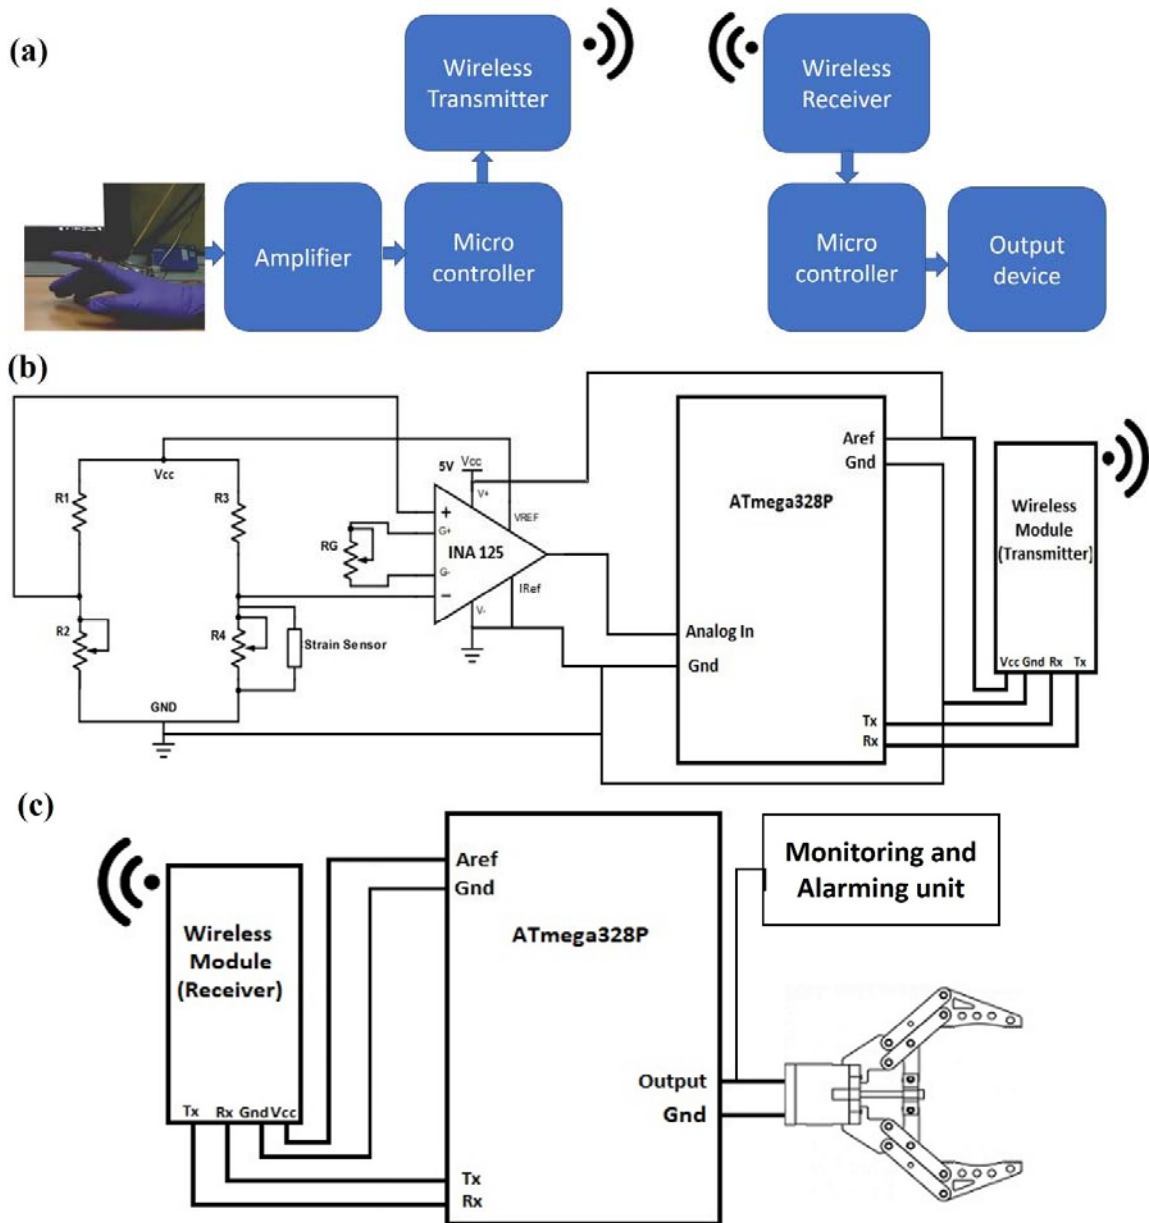

Figure S2. (a) Schematic of the wireless portable interfacing unit, (b) circuit diagram of the sensor interfacing and transmitting module and (c) circuit diagram of receiver module along with monitoring and alarming unit and actuator (robotic arm).

Table S1. The Electrical Conductivity of the PVDF/HEG and PVDF/PSS-HEG for Different Concentrations

| Wt%        | PVDF/HEG        |                 |                 |          | PVDF/PSS-HEG    |                 |                 |          |
|------------|-----------------|-----------------|-----------------|----------|-----------------|-----------------|-----------------|----------|
|            | 1 <sup>st</sup> | 2 <sup>nd</sup> | 3 <sup>rd</sup> | Mean     | 1 <sup>st</sup> | 2 <sup>nd</sup> | 3 <sup>rd</sup> | Mean     |
| <b>0.5</b> | 6.53E-9         | 5.53E-9         | 4.93E-9         | 5.643E-9 | 2.9E-8          | 2.10E-8         | 1.635E-8        | 2.212E-8 |
| <b>1</b>   | 7.03E-9         | 6.91E-9         | 5.91E-9         | 6.607E-9 | 3.801E-8        | 3.51E-8         | 3.162E-8        | 3.489E-8 |
| <b>1.5</b> | 7.31E-9         | 6.51E-9         | 5.41E-9         | 6.401E-9 | 4.8E-8          | 3.50E-8         | 1.676E-8        | 3.326E-8 |
| <b>2</b>   | 5.04E-7         | 3.02E-7         | 1.33E-7         | 3.11E-7  | 1.02E-6         | 9.80E-7         | 3.271E-8        | 6.772E-7 |
| <b>3</b>   | 5.81E-7         | 4.51E-7         | 2.31E-7         | 4.204E-7 | 1.82E-5         | 9.67E-6         | 5.318E-6        | 1.106E-5 |
| <b>4</b>   | 3.04E-7         | 1.01E-7         | 6.99E-8         | 1.566E-7 | 0.202           | 0.183           | 0.141           | 0.17515  |
| <b>5</b>   | 0.0029          | 0.0021          | 0.00162         | 0.00221  | 0.361           | 0.330           | 0.299           | 0.33011  |
| <b>6</b>   | 0.0015          | 0.00201         | 9.32E-4         | 0.00148  | 0.422           | 0.322           | 0.196           | 0.31341  |
| <b>7</b>   | 0.004           | 0.003           | 0.00247         | 0.00316  | 0.412           | 0.336           | 0.217           | 0.32161  |

# 1<sup>st</sup>, 2<sup>nd</sup> and 3<sup>rd</sup> are the different places on the polymer nanocomposite film along the longitudinal direction.
